# Supplementary material
Source: MDPI journal article supplement (https://www.mdpi.com/2079-6412/13/6/1006)
Supplement: s1 [file s1]

Supplementary Information

# Galvanic Deposition of Calcium Phosphate/Bioglass Composite Coating on AISI 316L

Claudio Zanca <sup>1</sup>, Alessandro Milazzo <sup>1</sup>, Simona Campora <sup>2</sup>, Elisa Capuana <sup>1</sup>, Francesco Carfi Pavia <sup>1,3</sup>, Bernardo Patella <sup>1</sup>, Francesco Lopresti <sup>1</sup>, Valerio Brucato <sup>1</sup>, Vincenzo La Carrubba <sup>1,4</sup> and Rosalinda Inguanta <sup>1,\*</sup>

<sup>1</sup> Department of Engineering, University of Palermo, Viale delle Scienze, 90128 Palermo, Italy

<sup>2</sup> Department of Biological, Chemical and Pharmaceutical Science and Technologies, University of Palermo, Viale Delle Scienze, Ed. 16, 90128 Palermo, Italy; simona.campora@unipa.it

<sup>3</sup> Consorzio Universitario di Caltanissetta, Corso Vittorio Emanuele 92, 93100 Caltanissetta, Italy

<sup>4</sup> ATeN Center, University of Palermo, Viale delle Scienze, 90133 Palermo, Italy

\* Correspondence: rosalinda.inguanta@unipa.it

**Citation:** Zanca, C.; Milazzo, A.; Campora, S.; Capuana, E.; Carfi Pavia, F.; Patella, B.; Lopresti, F.; Brucato, V.; La Carrubba, V.; Inguanta, R. Galvanic Deposition of Calcium Phosphate/Bioglass Composite Coating on AISI 316L. *Coatings* **2023**, *13*, 1006. <https://doi.org/10.3390/coatings13061006>

Academic Editors:  
Lavinia Cosmina Ardelean and  
Ajay Vikram Singh

Received: 30 December 2022

Revised: 20 May 2023

Accepted: 26 May 2023

Published: 29 May 2023

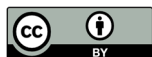

**Copyright:** © 2023 by the authors. Licensee MDPI, Basel, Switzerland. This article is an open access article distributed under the terms and conditions of the Creative Commons Attribution (CC BY) license (<https://creativecommons.org/licenses/by/4.0/>).

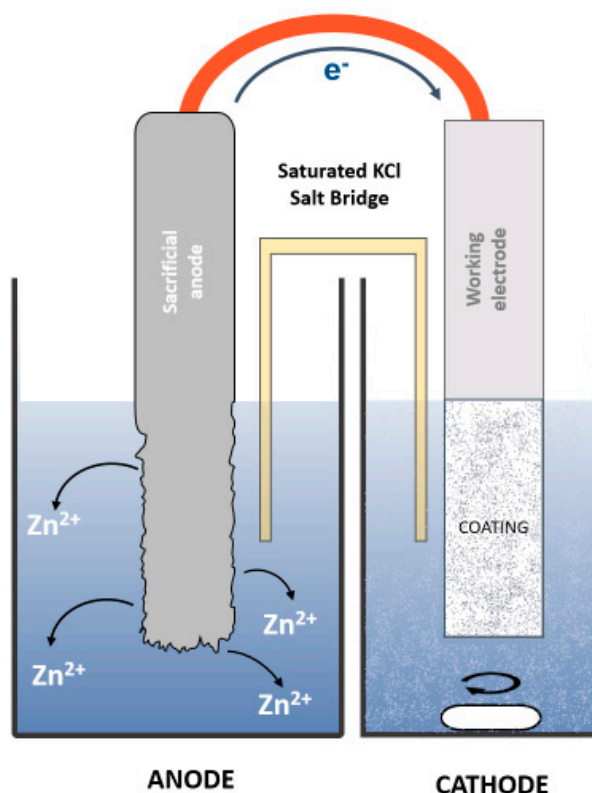

**Figure S1.** Cell layout.

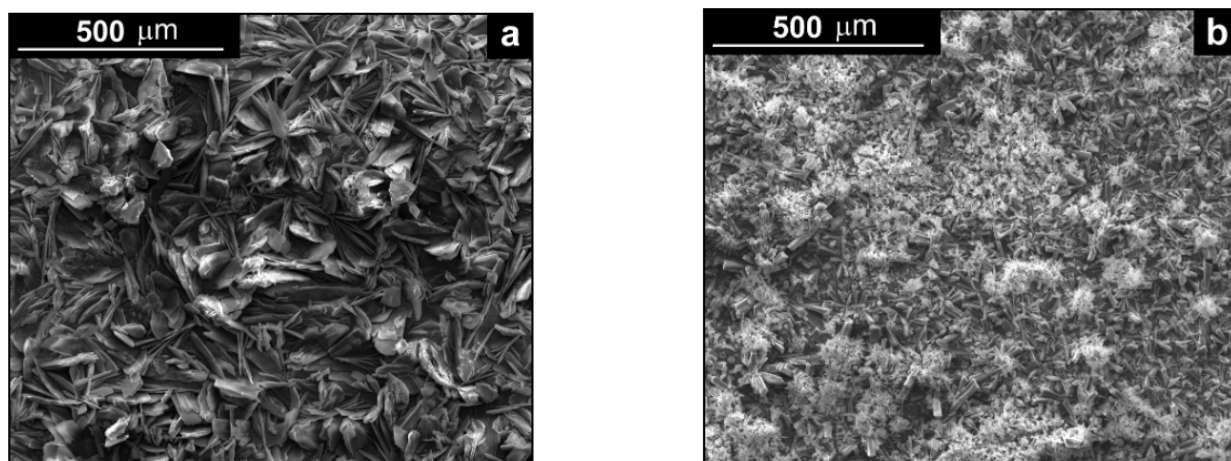

**Figure S2.** SEM images of CaP coatings obtained by galvanic deposition at different conditions: (a) unstirring, (b) and stirring.

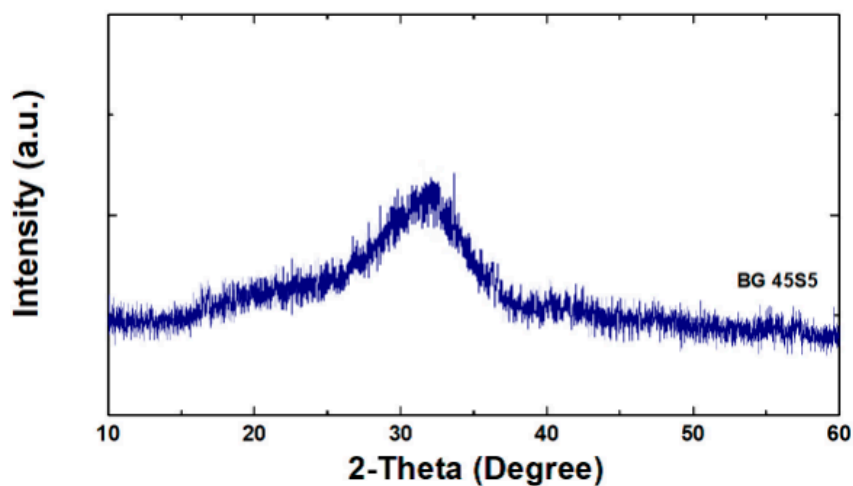

**Figure S3.** XRD pattern of Bioglass 45S5 powder.

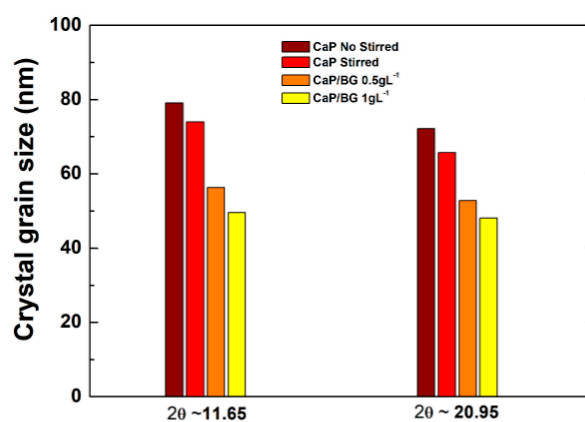

**Figure S4.** Grain size calculated by Scherrer's equation at  $2\theta$  degree equal to 11.65 and 20.95.

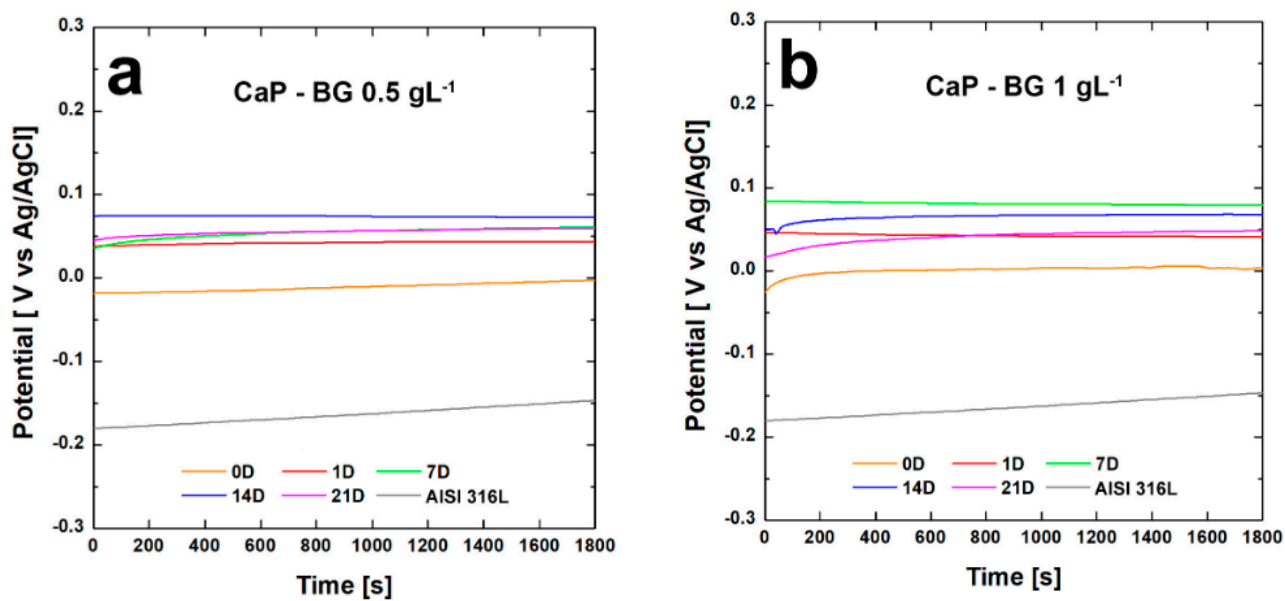

Figure S5. OCP curves of (a) CaP-BG 0.5 gL<sup>-1</sup> (b) CaP-BG 1 gL<sup>-1</sup>.

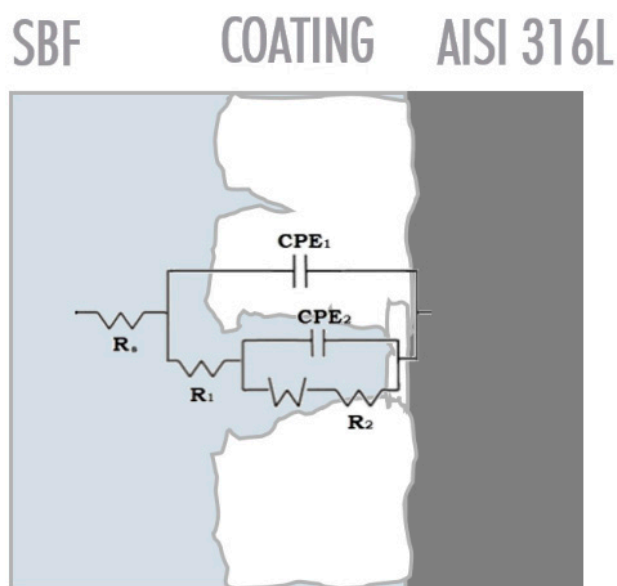

Figure S6. Equivalent Circuit used for the fitting of EIS data.

**Table S1.** Composition of SBF.

| Reagent                                           | Composition (gL <sup>-1</sup> ) |
|---------------------------------------------------|---------------------------------|
| NaCl                                              | 5.403                           |
| NaHCO <sub>3</sub>                                | 0.74                            |
| Na <sub>2</sub> CO <sub>3</sub>                   | 2.046                           |
| K <sub>2</sub> HPO <sub>4</sub> 3H <sub>2</sub> O | 0.23                            |
| MgCl <sub>2</sub> 6H <sub>2</sub> O               | 0.31                            |
| HEPES                                             | 11.93                           |
| CaCl <sub>2</sub>                                 | 0.29                            |
| Na <sub>2</sub> SO <sub>4</sub>                   | 0.072                           |
| 1M NaOH                                           | 0.8 mL                          |

**Table S2.** Fitting parameters of EIS data obtained for CaP-BG 1gL<sup>-1</sup>.

|                     | 0                     | 1                     | 7                     | 14                    | 21                    | AISI 316L             |
|---------------------|-----------------------|-----------------------|-----------------------|-----------------------|-----------------------|-----------------------|
|                     | R(Q(R(Q(RW))))        |                       |                       |                       |                       | R(QR)                 |
| R <sub>s</sub>      | 50                    | 51.85                 | 39.18                 | 17                    | 15                    | 38                    |
| CPE <sub>1</sub> -Y | $1.48 \times 10^{-8}$ | $2.44 \times 10^{-5}$ | $3.86 \times 10^{-6}$ | $6.04 \times 10^{-6}$ | $2.23 \times 10^{-6}$ | -                     |
| CPE <sub>1</sub> -n | 0.972                 | 0.5495                | 0.5526                | 0.5191                | 0.5679                | -                     |
| R <sub>1</sub>      | 82.08                 | 1059                  | 5029                  | 1816                  | 2256                  | -                     |
| CPE <sub>2</sub> -Y | $7.84 \times 10^{-6}$ | $9.01 \times 10^{-7}$ | $1.56 \times 10^{-5}$ | $6.75 \times 10^{-6}$ | $4.46 \times 10^{-5}$ | $8.71 \times 10^{-6}$ |
| CPE <sub>2</sub> -n | 0.6564                | 0.9214                | 0.6214                | 0.8176                | 0.5124                | 0.895                 |
| R <sub>2</sub>      | $1.94 \times 10^4$    | $5.09 \times 10^4$    | $9.04 \times 10^4$    | $1.10 \times 10^4$    | $3.57 \times 10^4$    | $7.54 \times 10^4$    |
| W                   | $2.37 \times 10^{-5}$ | $1.50 \times 10^{-5}$ | $2.21 \times 10^{-6}$ | $3.33 \times 10^{-5}$ | $1.52 \times 10^{-6}$ | -                     |
